1 **Pleiotrophin signals through ALK receptor to enhance growth of neurons in the presence of**  
2 **inhibitory CSPGs**

3 Somnath J Gupta <sup>1,2</sup>, Matthew A Churchward <sup>1,3</sup>, Kathryn G Todd <sup>1,2</sup> & Ian R Winship <sup>1,2,#</sup>

4 <sup>1</sup> Neurochemical Research Unit, Department of Psychiatry, Faculty of Medicine and  
5 Dentistry, University of Alberta, 12-127 Clinical Sciences Building, Edmonton, AB T6G  
6 2R3, Canada

7 <sup>2</sup> Neuroscience and Mental Health Institute, University of Alberta, Edmonton, AB T6G  
8 2R3, Canada

9 <sup>3</sup> Department of Biology and Environmental Sciences, Concordia University of Edmonton,  
10 T5B4E4, Edmonton, AB, Canada

11 #Corresponding author: Ian R Winship

12 E-mail: [iwinship@ualberta.ca](mailto:iwinship@ualberta.ca)

13 Keywords

14 Plasticity, neurons, CSPGs, PTN, ALK, neuronal growth.

15

## 16 **Summary statement**

17 Function in the central nervous system (CNS) is attributed to the complex interactions of  
18 neurons and glia. These cells are anchored in extracellular matrix (ECM) which constitutes  
19 about 10% - 20% of brain volume. Cells in the brain produce different components of the  
20 ECM in brain including chondroitin sulfate proteoglycans (CSPGs). After a nervous  
21 system injury, glial cells produce excess CSPGs that restrict the regeneration of neurons,  
22 thus limiting functional recovery. This study examines the role of the endogenous growth  
23 factor pleiotrophin (PTN) in driving the growth of neurons even in the presence of  
24 inhibitory CSPGs, and anaplastic lymphoma kinase (ALK) receptor as a key mediator by  
25 which PTN potentiates growth.

## 26 **Abstract**

27 Chondroitin sulfate proteoglycans (CSPGs), one of the major extracellular matrix  
28 components of the glial scar that surrounds central nervous system (CNS) injuries, are  
29 known to inhibit the regeneration of neurons. This study investigated whether pleiotrophin  
30 (PTN), a growth factor upregulated during early CNS development, can overcome the  
31 inhibition mediated by CSPGs and promote the neurite outgrowth of neurons *in vitro*. The  
32 data showed that a CSPG matrix inhibited the outgrowth of neurites in primary cortical  
33 neuron cultures compared to a control matrix. PTN elicited a dose dependent increase in  
34 the neurite outgrowth even in the presence of the growth inhibitory CSPG matrix, with  
35 optimal growth at 15 ng mL<sup>-1</sup> of PTN (114.8% of neuronal outgrowth relative to laminin  
36 control). The growth promoting effect of PTN was blocked by inhibition of the receptor  
37 anaplastic lymphoma kinase (ALK) by alectinib in a dose dependent manner. Neurite  
38 outgrowth in the presence of this CSPG matrix was induced by activation of the protein  
39 kinase B (AKT) pathway, a key downstream mediator of ALK activation. This study  
40 identified PTN as a dose-dependent regulator of neurite outgrowth in primary cortical  
41 neurons cultured in the presence of a CSPG matrix, and identified ALK activation as a key  
42 driver of PTN-induced growth.

## 43 Introduction

44 Chondroitin sulfate proteoglycans (CSPGs) are a major component of the extracellular  
45 matrix that surrounds cells of the central nervous system (CNS) (Siebert, Conta Steencken  
46 and Osterhout, 2014). CSPGs maintain CNS health by regulating growth of axons during  
47 development and protecting against oxidative stress (Morawski *et al.*, 2004). After CNS  
48 injury, activated glial cells increase synthesis of CSPGs to form a glial scar that contains  
49 the injury site (Siebert, Conta Steencken and Osterhout, 2014). The scar reduces lesion  
50 growth but also acts as a barrier for the regeneration of neurons that may limit functional  
51 recovery (Siebert, Conta Steencken and Osterhout, 2014; Wang *et al.*, 2009). CSPGs are  
52 also upregulated in neurodegenerative conditions including Alzheimer's disease (AD),  
53 Pick bodies in Pick's disease, and Lewy bodies in Parkinson's disease (PD) (Herradón and  
54 Pérez-García, 2014). Several experimental approaches have been investigated to neutralize  
55 the growth inhibitory effect of CSPGs *in vivo*, including digestion of CSPGs by  
56 chondroitinase ABC (ChABC), knockdown of CSPG polymerisation enzymes by RNA  
57 interference (RNAi), and peptide blocking the signalling of two major receptors of CSPGs:  
58 protein tyrosine phosphatase sigma ( $PTP\sigma$ ) and leukocyte antigen receptor (LAR) (Keough  
59 *et al.*, 2016). Although these strategies have shown positive effects on the growth of  
60 neurons in model systems, there are disadvantages that may limit translation to clinical use.  
61 Both ChABC and siRNA are exogenous macromolecules that must be delivered directly  
62 to the injury site, have short half-lives *in vivo*, and could induce immunological response  
63 due to repeated administration (Wong, 2008). Potentiating regeneration of neurons without  
64 degrading the glial scar may be possible via the heparin-binding growth factor pleiotrophin  
65 (PTN). PTN has long half life (Dreyfus *et al.*, 1998; Paveliev *et al.*, 2016) and may  
66 overcome the disadvantage of repeated administration associated with the use of ChABC  
67 and siRNA. PTN is a developmentally regulated protein whose expression peaks (in rats)  
68 3-4 weeks after birth (Wang, 2020). Notably, PTN expression is low in adults but increases  
69 transiently after CNS injury (Wang, 2020). PTN is associated with neuroplasticity  
70 including the maturation of new neurons and induction of neurite outgrowth (Tang *et al.*,  
71 2019). Notably, PTN may reverse aggrecan (a prominent CSPG) mediated inhibition *in*  
72 *vitro* by preventing the binding of (Paveliev *et al.*, 2016). In PD, PTN has shown to reduce  
73 nigrostriatal degeneration and improve functional recovery (Herradón and Pérez-García,

74 2014). Notably, PTN has a sustained presence in the tissue when injected into the nervous  
75 system directly. Moreover, identifying key receptors involved in PTN-induced  
76 neuroplasticity may allow for systemic pharmacotherapy.

77 PTN has several putative cell surface receptors, including receptor protein tyrosine  
78 phosphatase  $\zeta$  (RPTP $\zeta$ /PTPRZ), syndecans, nucleolin, neuropilin-1, integrin  $\alpha$ V $\beta$ 3 and  
79  $\alpha$ M $\beta$ 2, N-syndecan receptor, glypican 2, neuroglycan-C, and anaplastic lymphoma kinase  
80 (ALK) (Paveliev *et al.*, 2016; Wang, 2020). Moreover, PTN can integrate into the  
81 extracellular matrix, limiting CSPG interactions with growth-inhibitory receptor PTP $\sigma$  for  
82 a sustained period (Paveliev *et al.*, 2016).

83 This study investigates the potential role of ALK receptor activation by PTN to  
84 increase the growth of neurons in the presence of a CSPG matrix. ALK is expressed during  
85 early development in CNS, with low expression in the adult central nervous system  
86 (Vernersson *et al.*, 2006; Iwahara *et al.*, 1997). ALK signalling is critical for differentiation  
87 of neuronal progenitor cells to neurons and regulates their survival (Yao *et al.*, 2013; Tang  
88 *et al.*, 2019). By binding to CSPGs, PTN also reduces phosphatase activity of RPTP $\zeta$ ,  
89 which increases activity of ALK (Wang, 2020). Moreover, in developing neurons PTN  
90 signals directly via ALK receptor binding (Tang *et al.*, 2019; Yanagisawa *et al.*, 2009).  
91 Based on the evidence mentioned above ALK receptor plays a major role in neurogenesis  
92 and neuronal survival making it a potential receptor to investigate its involvement in PTN  
93 signaling in the presence of CSPGs. Thus, here we investigated to role of PTN signaling  
94 via ALK in driving neuron growth in the presence of inhibitory CSPGs. Our data reveals a  
95 dose dependent effect of PTN on neurite outgrowth in the presence of CSPGs. Notably,  
96 selective pharmacological inhibition of the ALK receptor attenuated the growth promoting  
97 effect of PTN.

## 98 **Results and Discussion**

### 99 **Pleiotrophin induces neurite outgrowth in the presence of CSPGs**

100 CSPGs are known to inhibit the growth of neurons. In order to understand the effect of  
101 PTN on neurite outgrowth, cortical neurons were cultured on the growth permissive  
102 (laminin) matrix or on the growth inhibitory (laminin + CSPGs) matrix and treated with

103 different concentrations of PTN ( $5 \text{ ng mL}^{-1}$  –  $20 \text{ ng mL}^{-1}$ ) for 72 h. MAP2  
104 immunofluorescence was used to quantify neurite outgrowth. Neurons showed extensive  
105 neurite outgrowth on the laminin matrix (Fig. 1A-C) that was inhibited by CSPGs (Fig. 1  
106 D-F). PTN restored neurite extension in a dose dependent manner (Fig. 1G-I). Neuronal  
107 morphology was analysed using the Simple Neurite Tracker plugin for ImageJ (Longair,  
108 Baker and Armstrong, 2011) (Fig. 1J). A dose dependent effect of PTN on total neurite  
109 outgrowth was observed, with PTN counteracting the inhibitory effect of CSPGs at  
110 concentrations below  $20 \text{ ng mL}^{-1}$  and maximal effect at  $15 \text{ ng mL}^{-1}$  concentration (Fig.  
111 1K). PTN treatment increased the complexity of cortical neuron neurite growth by  
112 increasing branched neurite growth, with maximum branch length observed at  $15 \text{ ng mL}^{-1}$   
113 PTN (Fig. 1L), and increased the number of neurons with neurite outgrowth at 10-15  $\text{ng mL}^{-1}$   
114 PTN (Fig. 1M). This data suggests that PTN at specific concentrations potentiates  
115 neurite extension. PTN has been shown to promote cell survival signal in dopaminergic  
116 neurons invitro and in a mouse model of Parkinson's disease PTN was shown to promote  
117 survival of grafted dopaminergic neurons, thus improving functional recovery of the  
118 nigrostriatal pathway (Herradón and Pérez-García, 2014; Hida *et al.*, 2007). These findings  
119 support PTN as a candidate to restore neurite extension in CSPG-rich lesion areas after  
120 CNS injury and other neurological conditions. Notably, PTN may also modulate the  
121 activity of glial cells including OPCs (Oligodendrocyte progenitor cell) and microglia.  
122 PTN induces differentiation of OPCs to mature oligodendrocytes, thus promoting  
123 myelination of developing neurons (Herradon and Ezquerro, 2009), and could therefore  
124 potentiate remyelination after injury. Microglia increase their release of neurotrophic  
125 factors including ciliary neurotrophic factor (CNTF), nerve growth factor (NGF) and brain-  
126 derived neurotrophic factor (BDNF) after stimulation with PTN (Miao *et al.*, 2012). Thus,  
127 in addition to direct actions on neurons, PTN is a strong candidate to generate an  
128 environment favouring the neuronal growth and its functionality by actions on multiple  
129 cell types. These data suggest PTN signaling may be an exciting approach to enhancing  
130 neuroplasticity after CNS injury, though the dose-response relationship for PTN in the  
131 presence of CSPGs will be important to verify *in vivo*.

132

### 133 **Pleiotrophin signals via ALK receptor on neurons**

134 PTN signals by inactivating the phosphatase activity of PTPR $\zeta$  (Herradon and  
135 Ezquerro, 2009). Currently available pharmacological inhibitors of PTPR $\zeta$  are quite limited  
136 (Herradon and Pérez-García, 2014). Thus, identifying other potential receptors for PTN  
137 may identify new targets to drive neuron growth. ALK is a putative PTN receptor, and is  
138 broadly expressed on cortical neurons *in vitro* (Fig. 2A-C). Treatment of primary neuronal  
139 cultures with alectinib, which selectively inhibits phosphorylation of ALK and therefore  
140 blocks activity of ALK (Tang *et al.*, 2019), was used to probe the involvement of the ALK  
141 receptor in PTN signalling. Alectinib induced a dose dependent inhibition of neurite  
142 outgrowth in PTN treated neurons cultured on a CSPG matrix (Fig. 2D-J). The available  
143 literature indicates the involvement of ALK in neuron like differentiation of PC12 cells  
144 (Palmer *et al.*, 2009) and depletion of ALK receptor attenuates neuronal proliferation and  
145 neurogenesis (Wulf *et al.*, 2021). Attenuation of neurite growth due to alectinib treatment  
146 provides strong evidence for the necessity of ALK activity in neurite extension, identifying  
147 a further avenue for investigation for development of ALK agonists to drive  
148 neuroplasticity.

### 149 **Activating the AKT pathway drives neurite growth**

150 The protein kinase B (AKT) pathway is a key downstream transducer of PTN/ALK  
151 signalling (Tang *et al.*, 2019). To investigate the involvement of this pathway in the  
152 regeneration of neurons, cortical neurons cultured on a CSPG matrix were treated with the  
153 AKT activating compound SC79 in the absence of PTN (Tang *et al.*, 2019). SC79 treated  
154 neurons showed a dose dependent enhanced neurite outgrowth even in the presence of  
155 CSPGs (Fig. 3A-G). Although activating AKT signalling with SC79 did not show an  
156 elevated response as compared to PTN treatment, with 15 ng mL<sup>-1</sup> PTN showing 114.8 %  
157 and 5 $\mu$ M SC79 with 78.43% increased neurite outgrowth compared to laminin control. The  
158 reason for reduced effectiveness of SC79 relative to PTN incubation could reflect other  
159 potential downstream activators of ALK signalling. ALK is known to activate many  
160 pathways including phospholipase C  $\gamma$ , Janus kinase (JAK), PI3K-AKT, mTOR and  
161 MAPK signaling cascades (Herradon and Ezquerro, 2009; Palmer *et al.*, 2009). Thus,  
162 blocking the ALK activity with alectinib blocks the activity of all these possible pathways

163 and induces a significant reduction in neurite growth even at the lowest tested concentration  
164 of 1.25 nM (Figure 2H). PTN/ALK signalling may therefore be a potential target to induce  
165 neuron regeneration after CNS injury or degenerative diseases associated with CSPG  
166 upregulation, including Alzheimer's, Parkinson's, and multiple sclerosis.

## 167 **Materials and Methods**

### 168 **Matrices preparation:**

169 Coverslips were coated with 100  $\mu\text{g mL}^{-1}$  Poly-L-Lysine (sigma-aldrich, P5899, USA) for  
170 2 hours. After 3 washes with water, the coverslips were coated with either a growth  
171 permissive matrix -10  $\mu\text{g mL}^{-1}$  of laminin (Corning, 354232) or an inhibitory matrix - 10  
172  $\mu\text{g mL}^{-1}$  laminin + 1.25  $\mu\text{g mL}^{-1}$  of CSPGs (sigma aldrich, CC117) for 2 hour and washed  
173 2 times with PBS.

### 174 **Primary cortical neuronal culture:**

175 All animal protocols were conducted in accordance with Canadian Council on Animal Care  
176 Guidelines and approved by the Animal Care and Use Committee: Health Sciences for the  
177 University of Alberta. Rat primary cortical neurons were isolated from 0-1day old Sprague  
178 Dawley rat pups. The cortices were dissected and digested with TrypLE (Gibco, 12605-  
179 028) for 15 minutes at 37°C. The cells were dissociated from tissue by trituration in  
180 neurobasal A medium (Thermofisher, 1088802) containing B27 supplement (1:50 v/v)  
181 (Gibco, 17504-044), antibiotics and GlutamX (Gibco, 35050-061). The cell suspension  
182 was seeded at 20,000 cells / well on coverslips with different matrices and incubated at 37  
183 °C, 5% CO<sub>2</sub> for 1 hour. Following incubation, the media was incubated (72 h) with media  
184 containing different concentration of recombinant human PTN (rhPTN, R&D systems 252  
185 - PL) or the drugs alectinib (Toronto Research Chemicals, C183665) or SC79 (Selleck  
186 Chemicals, S7863).

### 187 **Immunofluorescence**

188 Cells were fixed after 72 h of treatment with 5% formaldehyde solution for 15 min. and  
189 stained with microtubule-associated protein 2 (MAP 2) antibody (1:500, Sigma aldrich  
190 M9942), ALK (1:500, abcam ab190934) and Hoechst 33342 (1:1000, Invitrogen, 62249).



191 Statistical analyses of data from epifluorescent images were carried out using one-way  
192 ANOVA followed by Dunnett's multiple comparisons test Using Graphpad Prism (v9.1.2).

### 193 **Competing interests**

194 No competing interests declared.

### 195 **Author contributions**

196 SJG conceived the study with IRW, designed and analysed experiments, and wrote the  
197 manuscript. MAC, KGT, and IRW assisted with analysis and interpretation of data and co-  
198 wrote the manuscript.

### 199 **Funding**

200 This work was supported by the Canadian Institutes of Health Research (IRW, CIHR PS 166144),  
201 the Natural Sciences and Engineering Research Council (IRW, NSERC RGPIN-2017-05380), and  
202 the George Davey Endowment for Brain Research (KGT).

### 203 **References**

204 **Dreyfus, J., Brunet-De Carvalho, N., Duprez, D., Raulais, D. and Vigny, M.** (1998)  
205 'HB-GAM/pleiotrophin: Localization of mRNA and protein in the chicken developing  
206 leg', *International Journal of Developmental Biology*, 42(2), pp. 189–198.

207 **Herradon, G. and Ezquerra, L.** (2009) 'Blocking Receptor Protein Tyrosine  
208 Phosphatase B/Z: A Potential Therapeutic Strategy for Parkinsons Disease', *Current*  
209 *Medicinal Chemistry*, 16(25), pp. 3322–3329. doi: 10.2174/092986709788803240.

210 **Herradón, G. and Pérez-García, C.** (2014) 'Targeting midkine and pleiotrophin  
211 signalling pathways in addiction and neurodegenerative disorders: Recent progress and  
212 perspectives', *British Journal of Pharmacology*, pp. 837–848. doi: 10.1111/bph.12312.

213 **Hida, H., Masuda, T., Sato, T., Kim, T. S., Misumi, S. and Nishino, H.** (2007)  
214 'Pleiotrophin promotes functional recovery after neural transplantation in rats',  
215 *NeuroReport*, 18(2), pp. 179–183. doi: 10.1097/WNR.0b013e328011398e.

216 **Iwahara, T., Fujimoto, J., Wen, D., Cupples, R., Bucay, N., Arakawa, T., Mori, S.,**



- 217 **Ratzkin, B. and Yamamoto, T.** (1997) ‘Molecular characterization of ALK, a receptor  
218 tyrosine kinase expressed specifically in the nervous system’, *Oncogene*, 14(4), pp. 439–  
219 449. doi: 10.1038/sj.onc.1200849.
- 220 **Keough, M. B., Rogers, J. A., Zhang, P., Jensen, S. K., Stephenson, E. L., Chen, T.,**  
221 **Hurlbert, M. G., Lau, L. W., Rawji, K. S., Plemel, J. R., Koch, M., Ling, C. C. and**  
222 **Yong, V. W.** (2016) ‘An inhibitor of chondroitin sulfate proteoglycan synthesis promotes  
223 central nervous system remyelination’, *Nature Communications*. Nature Publishing  
224 Group, 7, pp. 1–12. doi: 10.1038/ncomms11312.
- 225 **Longair, M. H., Baker, D. A. and Armstrong, J. D.** (2011) ‘Simple neurite tracer:  
226 Open source software for reconstruction, visualization and analysis of neuronal  
227 processes’, *Bioinformatics*, 27(17), pp. 2453–2454. doi: 10.1093/bioinformatics/btr390.
- 228 **Miao, J., Ding, M., Zhang, A., Xiao, Z., Qi, W., Luo, N., Di, W., Tao, Y. and Fang,**  
229 **Y.** (2012) ‘Pleiotrophin promotes microglia proliferation and secretion of neurotrophic  
230 factors by activating extracellular signal-regulated kinase 1/2 pathway’, *Neuroscience*  
231 *Research*. Elsevier Ireland Ltd and Japan Neuroscience Society, 74(3–4), pp. 269–276.  
232 doi: 10.1016/j.neures.2012.09.001.
- 233 **Morawski, M., Brückner, M. K., Riederer, P., Brückner, G. and Arendt, T.** (2004)  
234 ‘Perineuronal nets potentially protect against oxidative stress’, *Experimental Neurology*,  
235 188(2), pp. 309–315. doi: 10.1016/j.expneurol.2004.04.017.
- 236 **Palmer, R. H., Vernersson, E., Grabbe, C. and Hallberg, B.** (2009) ‘Anaplastic  
237 lymphoma kinase: signalling in development and disease’, *Biochemical Journal*, 420(3),  
238 pp. 345–361. doi: 10.1042/bj20090387.
- 239 **Paveliev, M., Fenrich, K. K., Kislin, M., Kuja-Panula, J., Kuleskiy, E., Varjosalo,**  
240 **M., Kajander, T., Mugantseva, E., Ahonen-Bishopp, A., Khiroug, L., Kuleskaya,**  
241 **N., Rougon, G. and Rauvala, H.** (2016) ‘HB-GAM (pleiotrophin) reverses inhibition of  
242 neural regeneration by the CNS extracellular matrix’, *Scientific Reports*. Nature  
243 Publishing Group, 6, pp. 1–17. doi: 10.1038/srep33916.
- 244 **Siebert, J. R., Conta Steencken, A. and Osterhout, D. J.** (2014) ‘Chondroitin Sulfate

- 245 Proteoglycans in the Nervous System: Inhibitors to Repair’, *BioMed Research*  
246 *International*, 2014. doi: 10.1155/2014/845323.
- 247 **Tang, C., Wang, M., Wang, P., Wang, L., Wu, Q. and Guo, W.** (2019) ‘Neural Stem  
248 Cells Behave as a Functional Niche for the Maturation of Newborn Neurons through the  
249 Secretion of PTN’, *Neuron*. Elsevier Inc., 101(1), pp. 32-44.e6. doi:  
250 10.1016/j.neuron.2018.10.051.
- 251 **Vernersson, E., Khoo, N. K. S., Henriksson, M. L., Roos, G., Palmer, R. H. and**  
252 **Hallberg, B.** (2006) ‘Characterization of the expression of the ALK receptor tyrosine  
253 kinase in mice’, *Gene Expression Patterns*, 6(5), pp. 448–461. doi:  
254 10.1016/j.modgep.2005.11.006.
- 255 **Wang, H., Katagiri, Y., McCann, T. E., Unsworth, E., Goldsmith, P., Yu, Z. X., Tan,**  
256 **F., Santiago, L., Mills, E. M., Wang, Y., Symes, A. J. and Geller, H. M.** (2008)  
257 ‘Chondroitin-4-sulfation negatively regulates axonal guidance and growth’, *Journal of*  
258 *Cell Science*, 121(18), pp. 3083–3091. doi: 10.1242/jcs.032649.
- 259 **Wang, X.** (2020) ‘Pleiotrophin: Activity and mechanism’, *Advances in Clinical*  
260 *Chemistry*. doi: 10.1016/bs.acc.2020.02.003.
- 261 **Wong, J. W. J.** (2008) ‘Knocking down glycosaminoglycan synthesis’, *Journal of*  
262 *Neuroscience*, 28(11), pp. 2688–2689. doi: 10.1523/JNEUROSCI.0079-08.2008.
- 263 **Wulf, A. M., Moreno, M. M., Paka, C., Rampasekova, A. and Liu, K. J.** (2021)  
264 ‘Defining pathological activities of alk in neuroblastoma, a neural crest-derived cancer’,  
265 *International Journal of Molecular Sciences*, 22(21), pp. 1–20. doi:  
266 10.3390/ijms222111718.
- 267 **Yanagisawa, H., Komuta, Y., Kawano, H., Toyoda, M. and Sango, K.** (2009)  
268 ‘Pleiotrophin induces neurite outgrowth and up-regulates growth-associated protein  
269 (GAP)-43 mRNA through the ALK/GSK3 $\beta$ / $\beta$ -catenin signaling in developing mouse  
270 neurons’, *Neuroscience Research*, 66(1), pp. 111–116. doi:  
271 10.1016/j.neures.2009.10.002.
- 272 **Yao, S., Cheng, M., Zhang, Q., Wasik, M., Kelsh, R. and Winkler, C.** (2013)

273 ‘Anaplastic Lymphoma Kinase Is Required for Neurogenesis in the Developing Central  
274 Nervous System of Zebrafish’, *PLoS ONE*, 8(5). doi: 10.1371/journal.pone.0063757.

275 **Figures and Captions:**

276 **Figure 1:** Neurons cultured on laminin (growth permissive matrix) and stained for **(A)**  
277 Hoechst, **(B)** MAP 2 (Microtubule associated protein 2), **(C)** overlay. Neurons cultured on  
278 laminin + CSPGs (growth inhibitory matrix) and stained for **(D)** Hoechst, **(E)** MAP 2 **(F)**  
279 overlay. Neurons cultured laminin + CSPGs (growth inhibitory matrix) and treated with  
280 pleiotrophin (PTN) and stained for **(G)** Hoechst **(H)** MAP 2 **(I)** overlay. **(J)** Neurite  
281 outgrowth traced using simple neurite tracer plugin (SNT) in image J, total neurite growth  
282 (highlighted in purple + green), branched neurite outgrowth (highlighted in green) and  
283 neurons with no neurite outgrowth (indicated by yellow arrow). **(K)** PTN induces neurite  
284 growth in the presence of CSPGs (ANOVA,  $F_{(4,10)}=9.028$ ,  $P=0.0024$ ). **(L)** PTN induced  
285 branched neurite growth in the presence of CSPGs (ANOVA,  $F_{(4,10)}=3.740$ ,  $P=0.0413$ ) **(M)**  
286 PTN increases number of neurons with neurite growth in the presence of CSPGs (ANOVA,  
287  $F_{(4,10)}=4.560$ ,  $P=0.0235$ ). **(K – M)** Error bars represent standard error of mean (SEM),  
288 symbols \*, \*\* represent  $p<0.05$  and  $0.01$ , respectively, on Dunnett’s multiple comparisons  
289 against control. All data are based on 3 independent experiments with a minimum of three  
290 technical replicates.

291 **Figure 2:** Expression of ALK in cortical neuronal culture and stained for **(A)** ALK **(B)**  
292 MAP 2 and **(C)** overlay. Cortical neurons cultured on **(D)** laminin matrix **(E)** Laminin +  
293 CSPGs matrix **(F)** Laminin + CSPGs matrix and treated with PTN **(G)** Laminin + CSPGs  
294 matrix and treated with PTN and alectinib and stained for MAP2 and Hoechst. **(H)** Neurite  
295 growth induced by PTN in the presence of CSPGs is blocked by alectinib (ANOVA,  
296  $F_{(5,12)}=30.48$ ,  $P<0.0001$ ). **(I)** PTN induced branched neurite growth in the presence of  
297 CSPGs is blocked by alectinib (ANOVA,  $F_{(5,12)}=4.078$ ,  $P=0.0214$ ). **(J)** Alectinib reduced  
298 number of neurons with neurite growth in the presence of PTN in the presence of CSPGs  
299 (ANOVA,  $F_{(5,12)}=9.068$ ,  $P=0.0009$ ). **(H – J)** Error bars represent standard error of mean  
300 (SEM), symbols \*, \*\* and \*\*\*/\*\*\*\* represent  $P<0.05$ ,  $0.01$ , and  $0.001$  respectively. All  
301 data are based on 3 independent experiments with a minimum of three technical replicates.

302 **Figure 3:** Cortical neurons cultured on **(A)** laminin matrix **(B)** Laminin + CSPGs matrix  
303 **(C)** Laminin + CSPGs matrix and treated with PTN **(D)** Laminin + CSPGs matrix and  
304 treated with SC79 (AKT activator) and stained for MAP2 and Hoechst. **(E)** SC79 induced  
305 neurite growth in the presence of CSPGs (ANOVA,  $F_{(4,10)}=8.222$ ,  $P=0.0033$ ). **(F)** SC79  
306 increases branched neurite growth of neurons in the presence of CSPGs (ANOVA,  
307  $F_{(4,10)}=4.441$ ,  $P=0.0254$ ). **(G)** SC79 increases number of neurons with neurite growth in  
308 the presence of CSPGs (ANOVA,  $F_{(4,10)}=3.699$ ,  $P=0.0425$ ). **(E – G)** Error bars represent  
309 standard error of mean (SEM), symbols \* and \*\* represent  $p<0.05$  and  $0.01$ , respectively,  
310 on Dunnett's multiple comparisons against vehicle control. All data are based on 3  
311 independent experiments with a minimum of three technical replicates.

**Figure 1:**

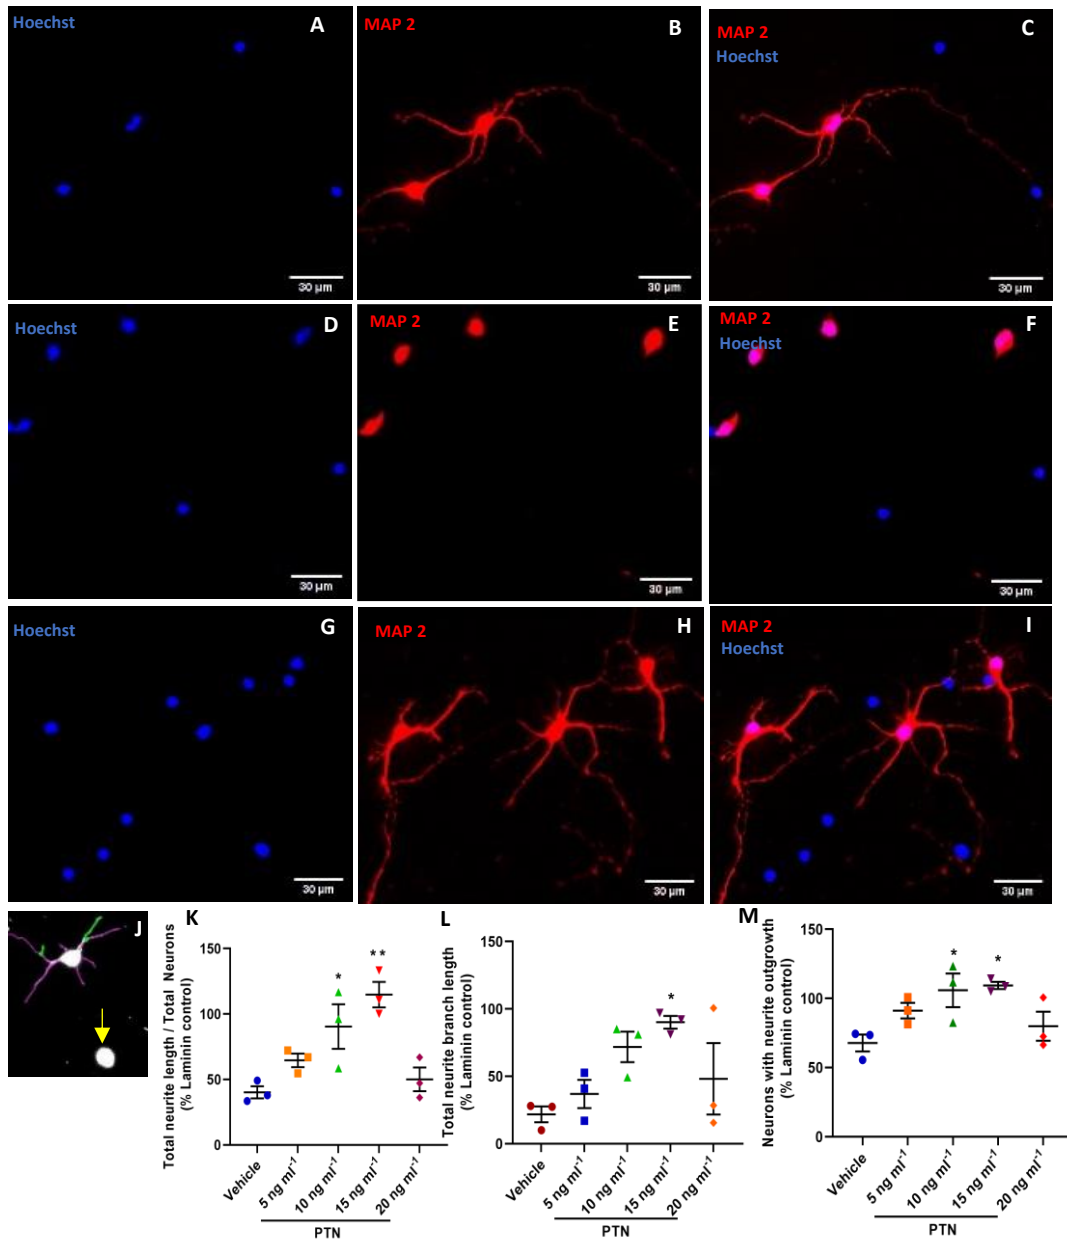

**Figure 2:**

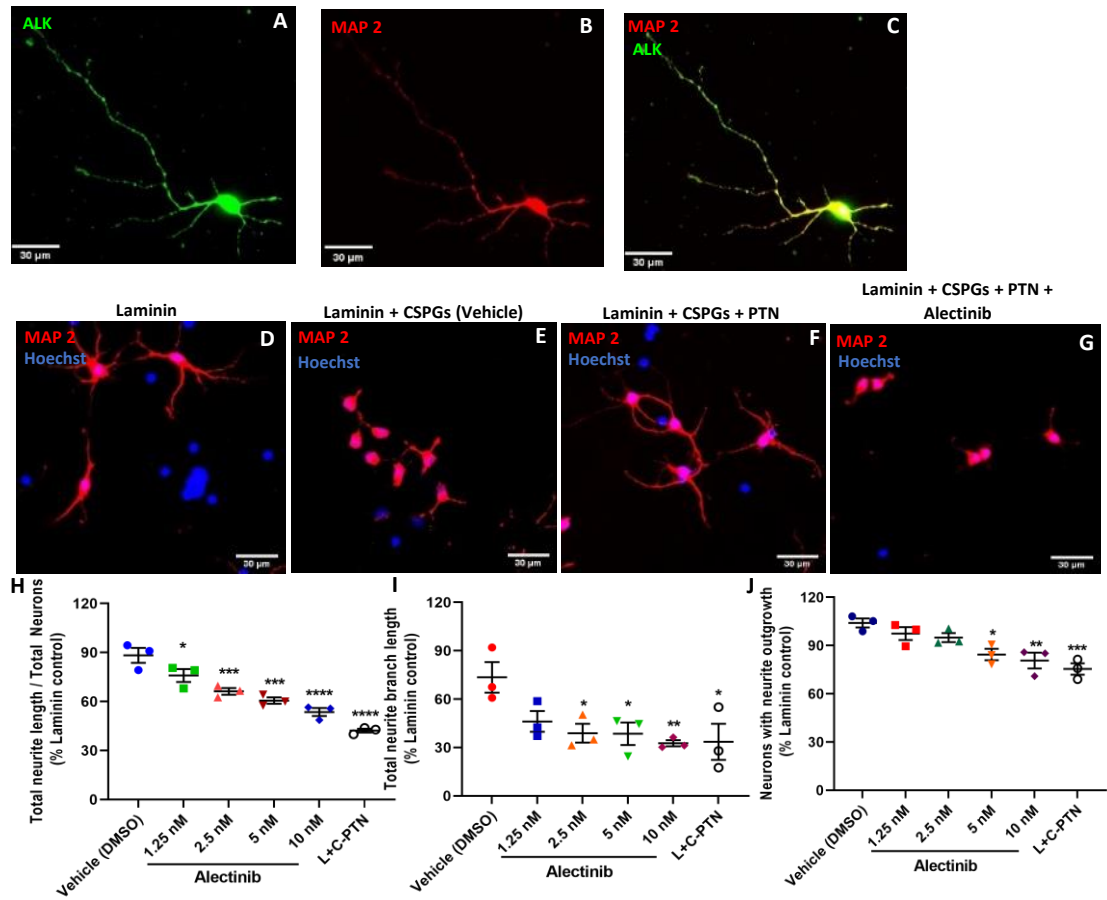

**Figure 3:**

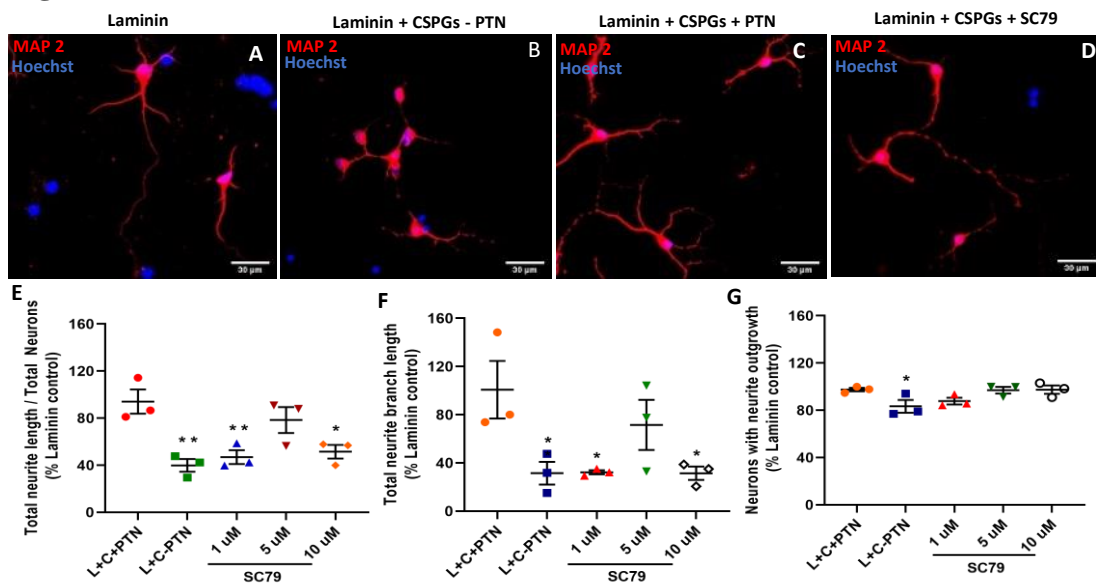

Source: http://biorxiv.org/content/10.1101/2022.04.01.486745v1.full.pdf
